# Supplementary material
Source: PubMed Central journal article supplement (PMC7598069)
Supplement: jci-130-130445-s403.pdf [file jci-130-130445-s403.pdf]

# Supplemental Data

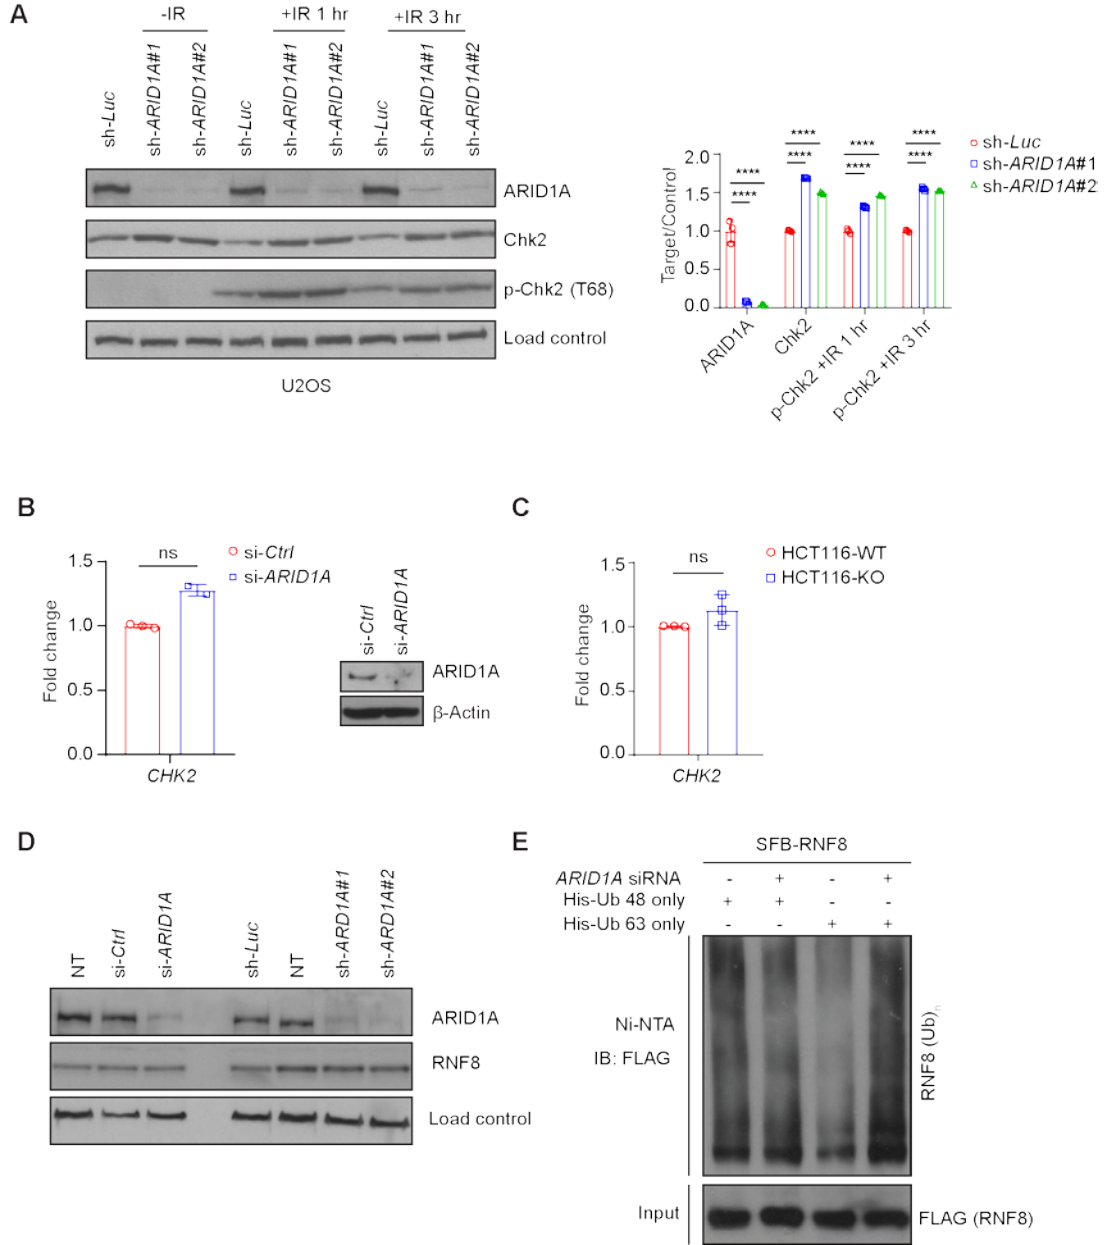

**Supplemental Figure 1. Depletion of *ARID1A* does not affect *CHK2* mRNA level or RNF8 protein level.** (A) Left, western blots of ARID1A, Chk2, and p-Chk2 in U2OS cells after exposure to 10 Gy ionizing radiation (IR). Right, quantitative analysis from normalization to loading control represent the mean  $\pm$  SD (ARID1A,  $P < 0.0001$ ; Chk2,  $p < 0.0001$ ; p-Chk2,  $p < 0.0001$  by one-way ANOVA with Dunnett's multiple comparisons test). (B) Left, qPCR analysis of *CHK2* mRNA expression in U2OS cells. Right, western blots indicate effective ARID1A knockdown. si-Ctrl, si-Nontarget; Quantitative analysis represents the mean  $\pm$  SD of three independent experiments. (C) *CHK2* mRNA expression in HCT116-WT and *ARID1A*-KO cells from RNA SEQ analysis. Quantitative analysis represents the mean  $\pm$  SD of three independent experiments. Two-tailed unpaired Student's *t* test (B and C). (D) Western blots of ARID1A and RNF8 in transient and stable *ARID1A*-knockdown U2OS cells. NT, Nontreated; si-Ctrl, si-Nontarget. (E) Immunoblot of U2OS cells transfected with indicated plasmid and siRNA, SFB-tagged (S-tag, Flag epitope tag, and streptavidin-binding peptide tag) RNF8 (SFB-RNF8), si-Nontarget, or siRNA targeting *ARID1A* along with His-ubiquitin (His-Ub) 48 or His-Ub 63 constructs.

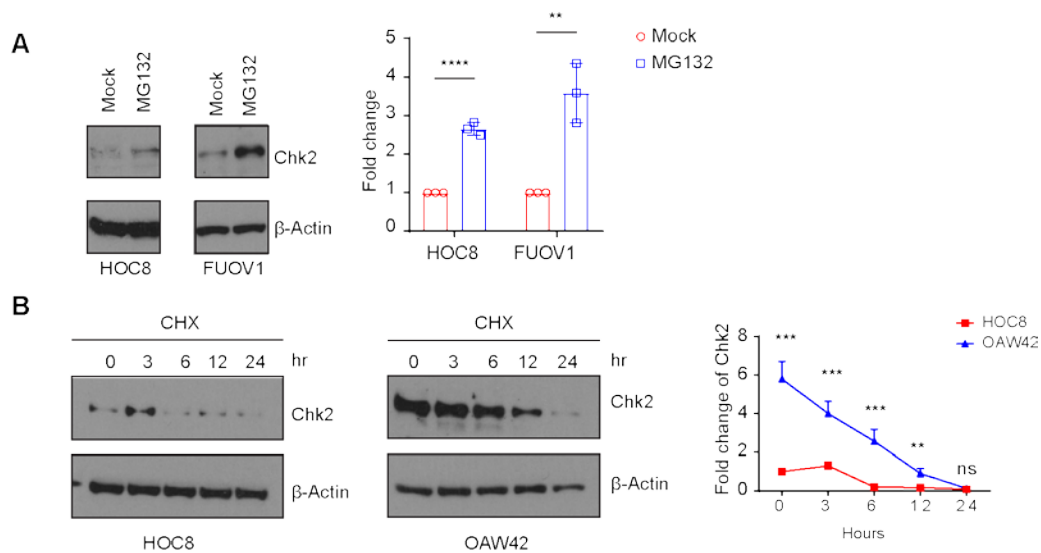

**Supplemental Figure 2. Chk1 expression is not affected by *ARID1A* deficiency. (A)** Left, western blots of Chk2 in ovarian cancer cell lines HOC8 and FUOV1 treated with MG132 (1  $\mu$ M) for 6 hours. Right, quantitative results represent the mean  $\pm$  SD of three independent experiments. \*\*,  $P < 0.01$ ; \*\*\*\*,  $P < 0.0001$ . **(B)** Western blots of Chk2 in ovarian cancer cell lines HOC8 (left) and OAW42 (middle) treated with cycloheximide (CHX) (25  $\mu$ g/ml). Right, quantitative results represent the mean  $\pm$  SD of three independent experiments. \*\*,  $P < 0.01$ ; \*\*\*,  $P < 0.001$ . Two-tailed unpaired Student's *t* test **(A and B)**.

**A**

Chk2 protein sequence, red indicate the mutant K.

```
MSRES DVEAQQSHGSSACSQPHG SVTQSQGSSSSQSGISSSSSTMPNSSQSSHSSSGTLSSLETVSTQE  
LYSIPEDQEPEDQEPPEPTPAPWARLWALQDGFANLECVNDNYWFGDRDKSCEYCFDEPLLKRTDKYRTYSK  
KHFRIREFVGPKN SYIAYIEDHSGNGTFVNTLVGKGKRRPLNNNSEIALSLSRNKVFVFFDLTVDDQSVYPKA  
LRDEYIMSKTLGSGACGEVKLAFERKTCKKVAIKIISKRKFAIGSAREADPALNVETEIEILKKNHPCKI KIKNFFD  
AEDYYIVLELMEGGELFDKVVGNKRLKEATCKLYFYQMLLAVQYLHENGIIHRDLKPENVLLSSQEEDCLIKITD  
FGHSKILGETSLMRTL CGTPTYLAPEVLVSVGTAGYNRAVDCWSLGVILFICLSGYPPPFSEHRTQVSLKDQITS  
GKYNFIPEVWAEVSEKALDLVKLLVDPKARFTTEEALRHPWLQDEDMKRKFQDLLSEENESTALPQVLAQ  
PSTSRKRPREGEAEGAETT KRPAVCAAVL
```

**B**

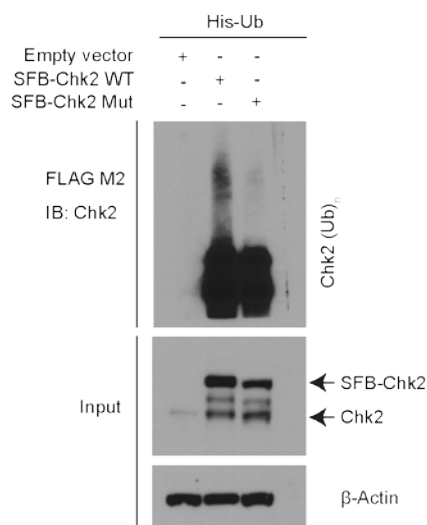

**Supplemental Figure 3. Identification of Chk2 poly-ubiquitination sites. (A)** Predictive Chk2 poly-ubiquitination sites. **(B)** Immunoblot of 293T cells transfected with indicated plasmid and siRNA, SFB-tagged (S-tag, Flag epitope tag, and streptavidin-binding peptide tag) Chk2 WT, SFB-Chk2 Mut (K492R, K494R, K520R and K534R) along with His-ubiquitin (His-Ub) constructs. IB, Chk2.

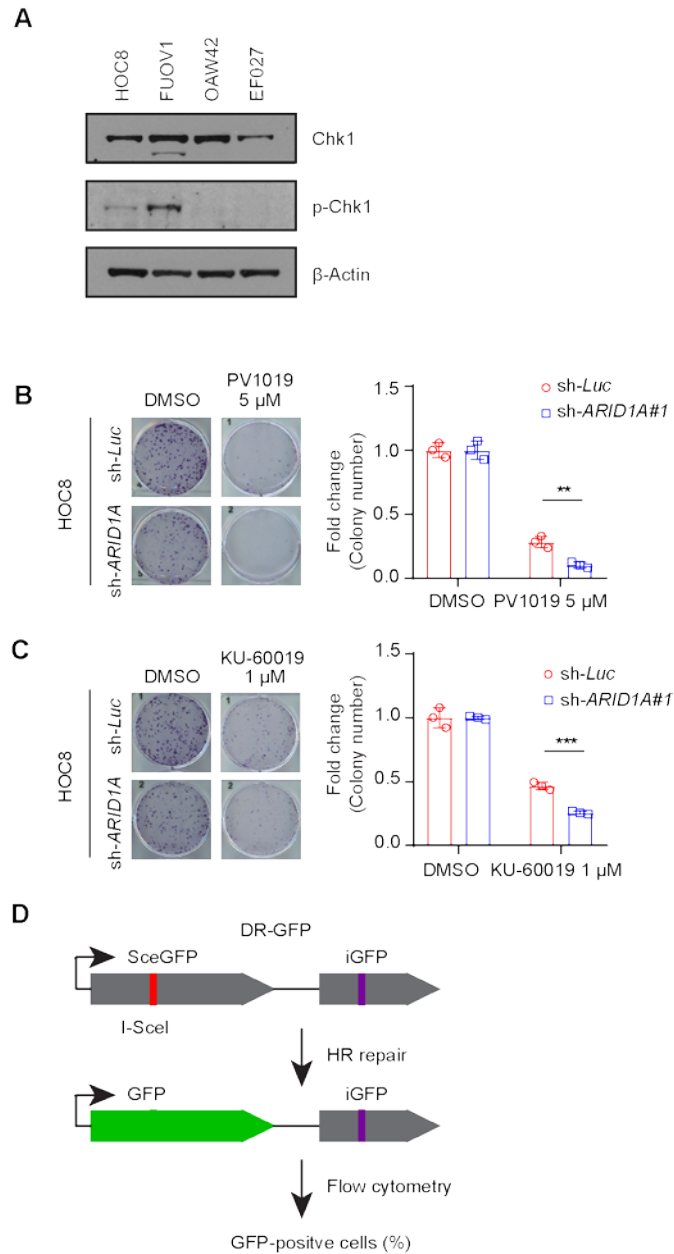

**Supplemental Figure 4. Inactivation of ATM-CHK2 axis sensitizes ovarian cancer cells with *ARID1A* depletion.** (A) Western blots of Chk1 in ovarian cancer cell lines with different levels of ARID1A. (B-C) *ARID1A*-knockdown HOC8 cells were treated with DMSO, PV1019 (B), or KU-60019 (C) at indicated concentrations. Clonogenic assays were performed. Left, representative images of colony formation. Right, quantitative results represent the mean  $\pm$  SD from three independent experiments. \*\*,  $P < 0.01$ ; \*\*\*,  $p < 0.001$  by two-tailed unpaired Student's *t* test. (D) Schematic diagram of the DR-GFP reporter assays.

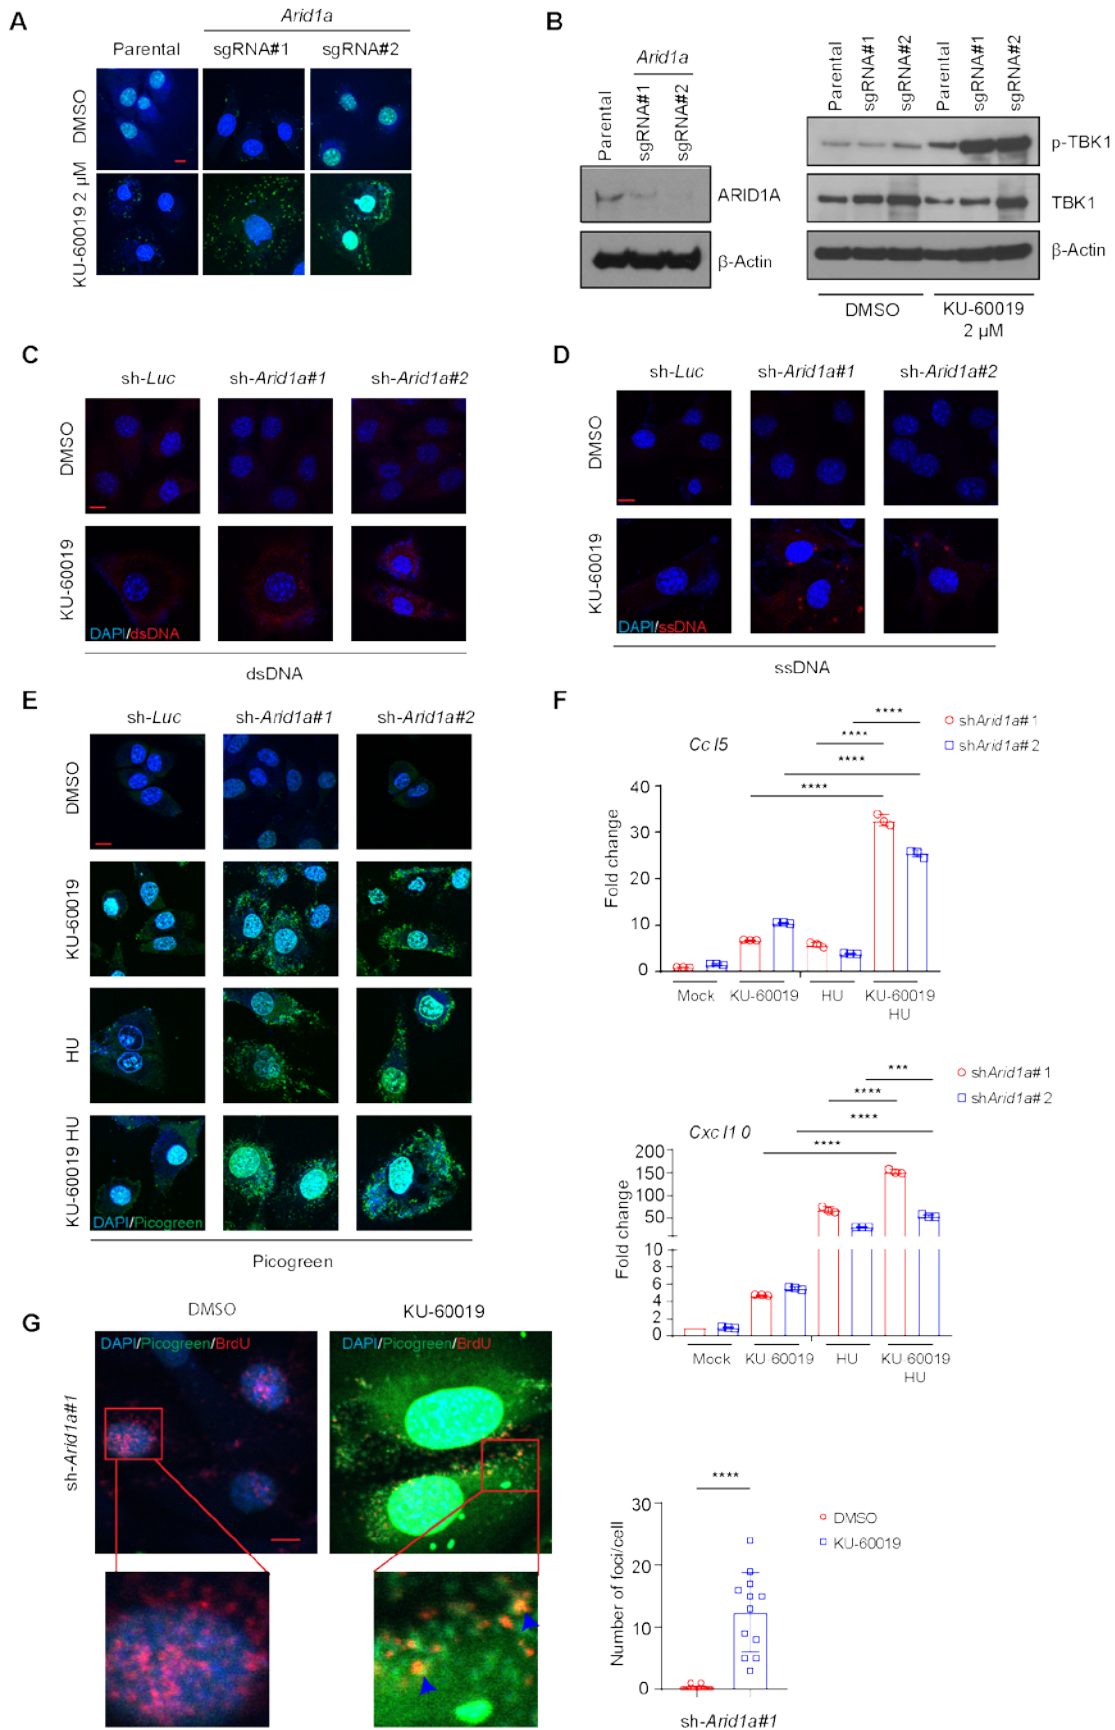

**Supplemental Figure 5. ATM inhibitor stimulates cytosolic DNA in ID8 *ARID1A*-KO cells.**

(A) Representative images of PicoGreen staining in parental and *Arid1a*-depleted (sgRNA#1 and #2) ID8 cells treated with DMSO or KU-60019 (2  $\mu$ M) for 48. DAPI (blue) was used to visualize the nuclei. Scale bar, 10  $\mu$ m. (B) Left, western blots indicate effective *Arid1a* knockdown. Right, western blots of phosphorylated TBK1 (p-TBK1) and total TBK1 (TBK1) in parental and *Arid1a*-depleted (sgRNA#1 and #2) ID8 cells treated with KU-60019 (2  $\mu$ M) for 48 hours. (C-D) Representative images of dsDNA (C) and ssDNA (D) immunostaining in control (sh-*Luc*) and *Arid1a*-depleted (sh-*Arid1a*#1 and #2) ID8 cells treated with DMSO, KU-60019 (2  $\mu$ M) for 48 hours. DAPI (blue) was used to visualize the nuclei. Scale bar, 10  $\mu$ m. (E). Representative images of PicoGreen staining in control (sh-*Luc*) and *Arid1a*-depleted (sh-*Arid1a*#1 and #2) ID8 cells treated with DMSO, HU (2 mM), KU-60019 (2  $\mu$ M) or combination treatment for 48 hours. DAPI (blue) was used to visualize the nuclei. Scale bar, 10  $\mu$ m. (F) qPCR analysis of *Ccl5* and *Cxcl10* mRNA expression in *Arid1a* knockdown ID8 cells under DMSO, HU (2mM), KU-60019 (2  $\mu$ M) or combination treatment for 48 hours. Data represent mean  $\pm$  SD of three independent experiments. \*\*\*,  $p < 0.001$ ; \*\*\*\*,  $p < 0.0001$ . (G) Left, Representative images of co-staining of BrdU and PicoGreen in *Arid1a* knockdown ID8 cells under DMSO or KU-60019 treatment. Right, quantitative results represent the mean  $\pm$  SD of three independent experiments. \*\*\*\*,  $p < 0.0001$ . ( $n = 12$ ). Scale bar, 10  $\mu$ m. One-way ANOVA with Sidak's multiple comparisons test (E and F), two-tailed unpaired Student's *t* test (G).

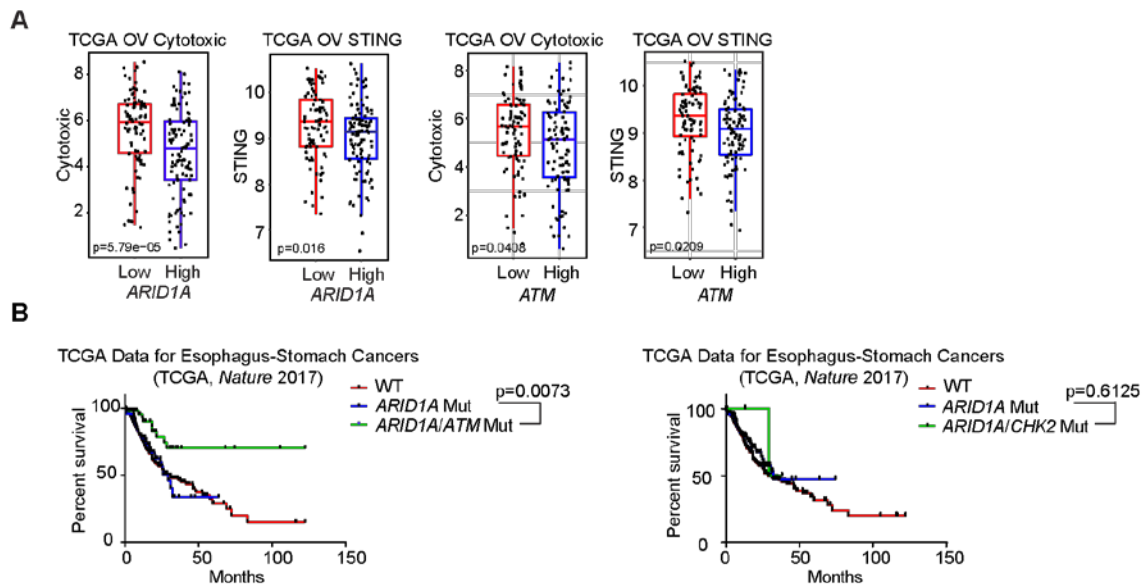

**Supplemental Figure 6. Inhibition of the ATM-Chk2 axis promotes TIL signatures. (A)**

Associations between different subsets of TIL signatures and *ARID1A* or *ATM* mRNA expression in TCGA ovarian (OV) tumors ( $n = 309$ ). The figures show associations of increased Cytotoxic and STING mRNA with reduced *ARID1A* or *ATM* mRNA expression (*ARID1A*: Cytotoxic  $p=5.79e^{-05}$ , STING  $p=0.016$ ; *ATM*, Cytotoxic  $p=0.0408$ , STING  $p=0.0209$ ). **(B)** Survival analysis for patients with esophagus or stomach cancer with *ARID1A*, *ATM*, and *CHK2* mutation (Mut). (Esophagus-Stomach,  $n = 518$ , *ARID1A/ATM* Mut ( $n = 19$ ) vs *ARID1A* Mut ( $n = 63$ ),  $p=0.0073$ ; *ARID1A/CHK2* Mut ( $n=5$ ) vs *ARID1A* Mut ( $n = 101$ ),  $p=0.6125$ ). Two-tailed unpaired Student's *t* test **(A and B)**.



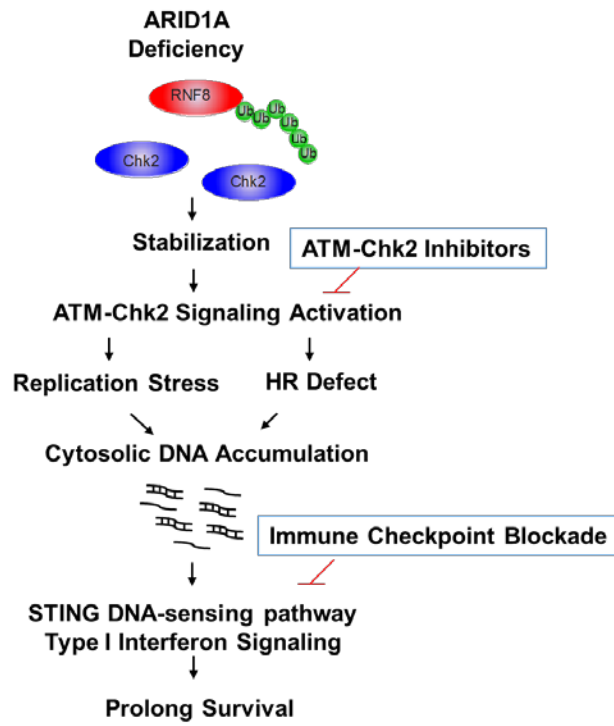

**Supplemental Figure 7. Proposed model by which inhibition of ATM-Chk2 potentiates the efficacy of ICB therapy in *ARID1A*-deficient cancers.**
